# Supplementary material for: Systematic review of educational interventions to improve the menstrual health of young adolescent girls
Source: HighWire-hosted journal article supplement (doi:10.1136/bmjopen-2021-057204), 2022-06-01
Supplement: bmjopen-2021-057204supp001_data_supplement.pdf [file bmjopen-2021-057204supp001_data_supplement.pdf]

## Supplementary File: Characteristics and quality of included studies

| Citation | Design                                                                      | Country | Study population                                                   | Sampling Method         | No of participants | Type of intervention                                            | MMAT Clear Research Questions /2 | MMAT Appropriate Data Collection?/2 | MMAT Supplementary questions relevant to methodology/5 | MMAT Total/9 | MMAT RAG rating |
|----------|-----------------------------------------------------------------------------|---------|--------------------------------------------------------------------|-------------------------|--------------------|-----------------------------------------------------------------|----------------------------------|-------------------------------------|--------------------------------------------------------|--------------|-----------------|
| (1)      | RCT quasi-experimental pre-test, post test                                  | Iran    | Mothers and adolescent school girls                                | Random Cluster-sampling | 364                | Half hour lecture and pamphlet distribution to improve attitude | 2                                | 1                                   | 5                                                      | 8            | Green           |
| (2)      | Quantitative Descriptive Case Series Quasi-experimental pre-test, post-test | Turkey  | Intellectually-disabled girls in special education training centre | convenience             | 77                 | Demonstration on doll to improve Pad-replacement skills         | 2                                | 2                                   | 4                                                      | 8            | Green           |
| (3)      | Quantitative descriptive one group pre-test, post-test                      | Iran    | All adolescent girls in two welfare                                | Purposive sampling      | 30                 | Group counselling in boarding centres                           | 2                                | 2                                   | 3                                                      | 7            | Amber           |

|     |                                                           |            |                                                                                           |                                                            |                                                                   |                                                        |   |   |   |   |       |
|-----|-----------------------------------------------------------|------------|-------------------------------------------------------------------------------------------|------------------------------------------------------------|-------------------------------------------------------------------|--------------------------------------------------------|---|---|---|---|-------|
|     |                                                           |            | boarding centres                                                                          |                                                            |                                                                   |                                                        |   |   |   |   |       |
| (4) | Quantitative descriptive case report; pre-test, post-test | Indonesia  | Mild-intellectually disabled girl                                                         | Purposive sampling                                         | 1                                                                 | Stories and video-modelling                            | 2 | 2 | 3 | 7 | Amber |
| (5) | Mixed methods, quantitative survey pre-test, post-test    | Ethiopia   | Girls enrolled in school in grades 6 and 7                                                | Cluster randomised approach                                | 636                                                               | Puberty Book 'Growth and Changes'                      | 2 | 2 | 5 | 9 | Green |
| (6) | RCT, pre-test, post-test                                  | India      | Adolescent high school girls aged 11 – 19 years of Zilla Parishad High School             | Systematic random technique (every other girl on register) | 250                                                               | Chalk and talk, posters, flipcharts,                   | 1 | 2 | 2 | 5 | Red   |
| (7) | Quantitative descriptive one group, Pre-test, post-test   | Bangladesh | adolescent female students aged 11–16 years, in grade 6–8, and living with their parents. | Random cluster sampling                                    | 416                                                               | Field manual training                                  | 2 | 2 | 3 | 7 | Amber |
| (8) | Qualitative understanding of quasi-RCT                    | Uganda     | school girls in eight study schools in primary classes grades 4 - 7.                      | Quasi-randomised cluster sampling                          | 27: education (n=8) pads alone (n=8) education and pads (n=6) and | 75 minute session of Straight Talk Education programme | 2 | 2 | 5 | 9 | Green |

|      |                                                                                        |        |                                                                 |                                       |                  |                                                                                    |   |   |   |   |       |
|------|----------------------------------------------------------------------------------------|--------|-----------------------------------------------------------------|---------------------------------------|------------------|------------------------------------------------------------------------------------|---|---|---|---|-------|
|      |                                                                                        |        |                                                                 |                                       | control<br>(n=5) |                                                                                    |   |   |   |   |       |
| (9)  | RCT pre-test post-test                                                                 | USA    | Children of both sexes whose parents had registered an interest | Random sampling                       | 80<br>(43 girls) | 'A New You, that's Who' video series                                               | 2 | 2 | 3 | 7 | Amber |
| (10) | 3 arm RCT Control and 2 intervention: peer and small group teaching pre-test/post-test | Iran   | Adolescent school girls                                         | Random sampling of three high schools | 90               | Small group and peer-teaching                                                      | 2 | 2 | 3 | 7 | Amber |
| (11) | Mixed methods Longitudinal study                                                       | Uganda | Girls and boys in secondary school                              | Purposive selection of schools        | 369              | Multi-component approach to optimising government guidelines for puberty education | 2 | 2 | 5 | 9 | Green |
| (12) | Quasi-experimental RCT, and pre-test, post-test                                        | Iran   | School girls                                                    | Random cluster sampling               | 152              | A model-based educational program                                                  | 1 | 2 | 2 | 5 | Red   |
| (13) | Quasi-experimental RCT                                                                 | Iran   | School girls aged 14 – 16 years and their parents               | Random cluster sampling               | 159              | Teaching programme with discussion                                                 | 2 | 2 | 3 | 7 | Amber |
| (14) | four-armed quasi-experimental RCT Pre and post test                                    | Uganda | Girls in grades 3 - 5                                           | Randomised                            | 1124             | Educational arm used Straight Talk                                                 | 1 | 2 | 0 | 3 | Amber |

|      |                                                                                   |           |                                                   |                                        |      |                                                                                    |   |   |   |   |       |
|------|-----------------------------------------------------------------------------------|-----------|---------------------------------------------------|----------------------------------------|------|------------------------------------------------------------------------------------|---|---|---|---|-------|
| (15) | Mixed Methods<br>Quantitative cross-sectional surveys and qualitative focus group | Nepal     | Girls in grades seven to ten in 28 large schools. | Random cluster sampling                | 860  | WASH in Schools (WinS) programme                                                   | 1 | 2 | 4 | 7 | Amber |
| (16) | Mixed methods process evaluation<br>Longitudinal study                            | Uganda    | Girls and boys in secondary school                | Purposive selection of schools         | 369  | Multi-component approach to optimising government guidelines for puberty education | 2 | 2 | 5 | 9 | Green |
| (17) | 3-arm single-site open cluster randomised controlled pilot study.                 | Kenya     | Primary girls aged 14 -16                         | Random cluster sampling                | 644  | Puberty education and menstrual cup instruction from nurse                         | 1 | 2 | 5 | 8 | Green |
| (18) | Quantitative non-random post-test only                                            | India     | Adolescent girls                                  | Purposive (schools) and random (girls) | 2206 | Monthly discussion group                                                           | 2 | 2 | 5 | 9 | Green |
| (19) | Quasi-experimental<br>Control/intervention pre-test post-test                     | Indonesia | Girls aged 9-12 pre-menarch                       | Stratified random sampling technique   | 174  | Booklet                                                                            | 2 | 2 | 2 | 6 | Amber |
| (20) | Experimental;<br>Intervention and control; pre-test, post-test                    | India     | Adolescent girls at a government high school      | Randomly sampled                       | 50   | One training session on menstrual hygiene                                          | 1 | 0 | 1 | 2 | Red   |
| (21) | Quantitative descriptive<br>Pre-test, post-test                                   | India     | Adolescent girls                                  | Multi-level stratified                 | 2564 | 'model' schools received                                                           | 1 | 2 | 5 | 8 | Green |

|      |                                                                                                 |       |                                       |                                                      |     |                                                                |   |   |   |   |       |
|------|-------------------------------------------------------------------------------------------------|-------|---------------------------------------|------------------------------------------------------|-----|----------------------------------------------------------------|---|---|---|---|-------|
|      |                                                                                                 |       |                                       | sampling of schools                                  |     | additional WASH support and education embedded into curriculum |   |   |   |   |       |
| (22) | A quasi-experimental RCT two group pretest-posttest design                                      | China | Adolescent girls                      | Purposive sampling of schools                        | 116 | Researcher – led Menstrual Hygiene Class                       | 2 | 2 | 4 | 8 | Green |
| (23) | Mixed methods. Qualitative review and semi-quantitative measure of cup use nested in larger RCT | Kenya | Post-menarche adolescent girls        | Random allocation of 10 schools to menstrual cup arm | 192 | Puberty education and menstrual cup instruction from nurse     | 1 | 2 | 5 | 8 | Green |
| (24) | RCT three arm – educating girls, educating mothers or control. pre and post test                | Iran  | Post-menarche adolescent school girls | 12 purposively sampled schools                       | 327 | 30 minute lecture on puberty hygiene plus a booklet            | 0 | 1 | 5 | 6 | Amber |

#### Summary of characteristics of included studies

Framework analysis and the ‘best fit’ principle were used to score the studies (25–27). All studies were interrogated with two questions ‘Are there clear research questions?’ and ‘Do the collected data allow the research questions to be addressed?’ which were considered fundamental to the quality and were scored on a scale of ‘Yes’ = 2, ‘not clear’ = 1 and ‘No’ = 0. Five further supplementary questions were considered that addressed quality issues such as sample size. The sets of questions were different depending upon the study design, and are not directly comparable, so less weight was given to these; Yes = 1 and No = 0. The maximum score when added together was 2 + 2 + 5 = 9. Studies scored 0-5 were categorised as low quality (as it was possible to get these scores without clear research questions or valid methods); those that scored 6 or 7 were scored as moderate quality and those that scored 8 or 9 were scored as high quality (a subjective scale based on personal expertise (27) and community of practice validation (28)).

#### REFERENCES

1. Afsari A, Mirghafourvand M, Valizadeh S, Abbasnezhadeh M, Galshi M, Fatahi S. The effects of educating mothers and girls on the girls' attitudes toward puberty health: A randomized controlled trial. *Int J Adolesc Med Health*. 2015;2015.
2. Altundağ S, Çalbayram NÇ. Teaching menstrual care skills to intellectually disabled female students. *Mol Ecol*. 2016;25(13–14):1962–8.
3. Arasteh FE, Shobeiri F, Parsa P, Mohamadi Y. Effect of group counseling on adolescent girls in improving knowledge and practice of menstrual hygiene in welfare boarding centers. *J Postgrad Med Inst*. 2019;33(1):46–51.
4. Ariyanti TD, Royanto LRM. The Effectiveness of Social Stories and Video Modeling in Improving Self-Care Skills in Female Adolescents with Mild Intellectual Disabilities during Menstrual Periods. 2018;135(Iciap 2017):189–99.
5. Blake S, Boone M, Yenew Kassa A, Sommer M. Teaching Girls About Puberty and Menstrual Hygiene Management in Rural Ethiopia: Findings From a Pilot Evaluation. *J Adolesc Res*. 2018;33(5):623–46.
6. Rani Chadalawada U, Devi S A, Rani M S. Effect of Health Education on Adolescent Girls Regarding Knowledge About Menstruation. *J Evol Med Dent Sci*. 2017;6(13):1040–3.
7. Haque SE, Rahman M, Itsuko K, Mutahara M, Sakisaka K. The effect of a school-based educational intervention on menstrual health: An intervention study among adolescent girls in Bangladesh. *BMJ Open*. 2014;4(7):1–9.
8. Hennegan J, Montgomery P. Do menstrual hygiene management interventions improve education and psychosocial outcomes for women and girls in low and middle income countries? A systematic review. *PLoS One*. 2016;11(2):1–22.
9. Hurwitz LB, Lovato SB, Lauricella AR, Woodruff TK, Patrick E, Wartella E. “A New You, That’s Who”: an evaluation of short videos on puberty and human reproduction. *Palgrave Commun*. 2018;4(1).
10. Jarrahi R, Golmakani N, Mazlom SR. Effect of menstrual hygiene education based on peer and small group teaching methods on hygiene behaviors in female adolescents: A comparative study. *Evid Based Care J*. 2020;10(1):70–4.
11. Kansiime C, Hytti L, Nalugya R, Nakuya K, Namirembe P, Nakalema S, et al. Menstrual health intervention and school attendance in Uganda (MENISCUS-2): A pilot intervention study. *BMJ Open*. 2020;10(2):1–11.
12. Kheirollahi F, Rahimi Z, Arsang-Jang S, Sharifirad G, Sarraf P, Gharlipour Z. Puberty health status among adolescent girls: A model- based educational program. *Int J Pediatr*. 2017;5(7):5369–78.
13. Mokari H, Khaleghparast S, Samani LN. Impact of Puberty Health Education on Anxiety of Adolescents. *Int J Med Res Heal Sci*. 2016;5(5, S, SI):284–91.

14. Montgomery P, Hennegan J, Dolan C, Wu M, Steinfield L, Scott L. Menstruation and the Cycle of Poverty: A Cluster Quasi-Randomised Control Trial of Sanitary Pad and Puberty Education Provision in Uganda. *PLoS One*. 2016;11(12).
15. Morrison J, Basnet M, Bhatt A, Khimbanjar S, Chaulagain S, Sah N, et al. Girls' menstrual management in five districts of Nepal: Implications for policy and practice. *Stud Soc Justice*. 2018;12(2):251–72.
16. Nalugya R, Tanton C, Hytti L, Kansime C, Nakuya K, Namirembe P, et al. Assessing the effectiveness of a comprehensive menstrual health intervention program in Ugandan schools (MENISCUS): process evaluation of a pilot intervention study. *Pilot Feasibility Stud*. 2020;6(1):1–15.
17. Phillips-Howard PA, Nyothach E, Ter Kuile FO, Omoto J, Wang D, Zeh C, et al. Menstrual cups and sanitary pads to reduce school attrition, and sexually transmitted and reproductive tract infections: A cluster randomised controlled feasibility study in rural Western Kenya. *BMJ Open*. 2016;
18. Ramaiya A, Malhotra A, Cronin C, Stevens S, Kostizak K, Sharma A, et al. How does a Social and Behavioral Change Communication Intervention Predict Menstrual Health and Hygiene Management: A Cross-Sectional Study. *BMC Public Health*. 2019;19(1):1–12.
19. Setyowati S, Rizkia M, Ungsianik T. Improving Female Adolescents' Knowledge, Emotional Response, and Attitude toward Menarche following Implementation of Menarcheal Preparation Reproductive Health Education. *Asian/Pacific Isl Nurs J*. 2019;4(2):84–91.
20. Sharma R, Sandhya N, Deepika K, Varsha S, Vardha. Menstrual hygiene among adolescent girls. *Indian J Community Heal*. 2015;27(3):376–80.
21. Sivakami M, van Eijk AM, Thakur H, Kakade N, Patil C, Shinde S, et al. Effect of menstruation on girls and their schooling, and facilitators of menstrual hygiene management in schools: Surveys in government schools in three states in India, 2015. *J Glob Health*. 2019;9(1).
22. Su JJ, Lindell D. Promoting the menstrual health of adolescent girls in China. *Nurs Heal Sci*. 2016;18(4):481–7.
23. Van Eijk AM, Sivakami M, Thakkar MB, Bauman A, Laserson KF, Coates S, et al. Menstrual hygiene management among adolescent girls in India: A Systematic review and meta-analysis. *BMJ Open*. 2016;6(3).
24. Valizadeh S, Assdollahi M, Mirghafourvand M, Afsari A. Educating Mothers and Girls about Knowledge and Practices toward Puberty Hygiene in Tabriz, Iran: A Randomized Controlled Clinical Trial. *Iran Red Crescent Med J*. 2017;19(2).
25. Carroll C, Booth A, Cooper K. A worked example of “best fit” framework synthesis: A systematic review of views concerning the taking of some potential chemopreventive agents. *BMC Med Res Methodol*. 2011;11.
26. Carroll C, Booth A, Leaviss J, Rick J. “best fit” framework synthesis: Refining the method. *BMC Med Res Methodol*. 2013;13(1).
27. Suto I. A critical review of some qualitative research methods used to explore rater cognition. *Educ Meas Issues Pract*. 2012;31(3):21–30.
28. Bejar II. A validity-based approach to quality control and assurance of automated scoring. *Assess Educ Princ Policy Pract*. 2011;18(3):319–41.
